# Supplementary material
Source: ML conference proceedings conference paper supplement (https://aclanthology.org/D16-1038)
Supplement: Attachment [file D16-1038.Attachment.pdf]

# Event Seeds

**Type : LIFE Sub-type: BE-BORN**

Jane Doe was born in Casper, Wyoming on March 18, 1964.

John Robert Bond was born in England.

While investigators said they did not yet know where the Massachusettsborn suspect got his guns, Scott Harshbarger, the former state attorney general who pushed for more stringent state gun-control rules in the late 1990s, said, "This is where you'll see if the tracing system works."

Ali Mohammed, a native of Egypt, has admitted to five charges of conspiring with a Saudi born dissident Osama bin Laden to attack US targets in the Middle-East.

For me, it's not difficult, because I was born without my hand, and I've never known any different.

They have been linked to cancer, birth defects, and other genetic abnormalities.

He calculated that Jesus' birth had occurred 532 years earlier.

**Type : LIFE Sub-type: MARRY**

Jane and John are married.

They have been married for six years.

Ames recruited her as an informant in 1983, then married her two years later.

In 1927 she married William Gresser, a New York lawyer and musicologist.

He'd been married before and had a child.

Residents were unable to register marriages.

**Type : LIFE Sub-type: DIVORCE**

The couple divorced four years later.

John is a divorced father of three.

Fox and his four adopted children \_ he is divorced will move into guest quarters behind the presidential residence

Jephson, who was also Prince Charles' secretary for two years, said that the Princess confided in him a great deal, especially in the years preceding her divorce from the heir to the throne in 1996.

This year in Egypt, for example, avid campaigning helped women reverse laws that prevented them from obtaining divorce and traveling abroad without their husbands' permission.

But the Simpson trial and the jury's findings marked a turning point in the career of the twice-divorced mother of two.

**Type : LIFE Sub-type: INJURE**

Two soldiers were wounded in the attack.

The injured soldier...

She was badly hurt in an automobile accident.

Two Palestinians were killed as they staged a drive-by ambush on an Israeli jeep in the Gaza Strip near the Israeli settlement of Gush Katif Saturday afternoon, and two Israeli soldiers were wounded, one critically.

Witnesses said the soldiers responded by firing tear gas and rubber bullets, which led to ten demonstrators being injured.

Tornadoes destroyed homes and overturned cars in several areas of Alabama on Saturday and more than two dozen people were reported injured.

A fire in a bangladeshi garment factory has left at least 37 people dead and 100 hospitalized.

**Type : LIFE Sub-type: DIE**

John Hinckley attempted to assassinate Ronald Reagan.

Terrorist groups have threatened to kill foreign hostages.

The slain leader...

She was killed in an automobile accident.

The commander of Israeli troops in the West Bank said there was a simple goal to the helicopter assassination on Thursday of a gun-wielding local Palestinian leader.

The assassination of the once-relatively obscure Fatah leader Obaiyat, whom the army blamed particularly for leading nocturnal shooting on Gilo, a neighborhood in southeastern Jerusalem, was regarded as a grave step by Israeli commentators.

The late Pope John Paul II ...

**Type : MOVEMENT Sub-type: TRANSPORT**

The aid was aimed at repairing houses damaged by Israeli bombing and buying additional ambulances" to transport the rising number of wounded.

Zone escaped the incident with minor injuries, and Kimes was moved to the prison's disciplinary housing unit, the authorities said.

The Palestinian leaders also warned that Israel must remove its soldiers from the outskirts of Palestinian cities.

Mr. Erekat is due to travel to Washington to meet with US Secretary of State Madeleine Albright and other US officials attempting to win a ceasefire.

The weapons were moved to a secure site in the south.

**Type : TRANSACTION Sub-type: TRANSFER-OWNERSHIP**

China has purchased two nuclear submarines from Russia.

This report concerns China's recently acquired submarines.

If the man accused of killing seven people near Boston on Tuesday got his guns in Massachusetts, he was able to skirt some of the strictest regulations in the country, people familiar with the state's laws said Wednesday.

The state requires a permit, formally known as a ``firearm identification card," for purchase of virtually every kind of firearm, whether for personal protection or hunting.

There is also a scandal that erupted over Russia's declaration that it will sell weapons to Iran, contrary to the earlier made agreement.

The head of the agency's coordination program in Amman, Maher Nasser, said in a press conference that the aid was aimed at "providing food and medical aid to Palestinian refugees in the West Bank and Gaza suffering as a result of the Israeli blockade of the Palestinian Territories, as well as at repairing houses damaged by Israeli bombing and buying additional ambulances" to transport the rising number of wounded.

**Type : TRANSACTION Sub-type: TRANSFER-MONEY**

The charity was suspected of giving money to Al Qaeda.

The organization survives on donations.

The organization is living on borrowed funds.

Actors and singers also on the flight held a benefit concert in Baghdad Saturday evening, with most of the \$13 cover charge to be donated to support the Palestinian uprising.

I'd like to see them accept his offer," said Jean Dolan, 59, a retired singing instructor who borrowed about \$10,500 to buy Eircom shares in the IPO in July 1999.

**Type : BUSINESS Sub-type: START-ORG**

Joseph Conrad Parkhurst, who founded the motorcycle magazine Cycle World in 1962, has died.

British Airways PLC plans to sell Go, its profitable cut-price subsidiary launched two years ago, the company said Monday.

We have done about 10 days of solid work across Michigan. Workers fighting for right to organize.

**Type : BUSINESS Sub-type: MERGE-ORG**

In July, Bank of America said it planned to cut as many as 10,000 jobs as it changes its focus from growing through mergers to becoming more profitable through use of technology and operating efficiency.

Three U.S. banks, Chase Manhattan and its merger partner J.P. Morgan and Citibank, which was involved in moving about \$100 million for Raul Salinas de Gortari, brother of a former Mexican president, to banks in Switzerland, are also expected to sign on, according to UBS.

Talks on a long-planned merger with KLM Royal Dutch Airlines collapsed in September.

In a drastic measure earlier this month, government-controlled creditor banks named 52 financially weak companies that should be shut down or merged for sale.

Parkhurst later merged with another company that owned Road & Track to become Bond/Parkhurst Publishing.

The drug companies passed the final regulatory hurdle to their \$72 billion merger, which will create the world's largest pharmaceutical company.

**Type : BUSINESS Sub-type: DECLARE-BANKRUPTCY**

Orange County had previously filed Chapter 11 in 1995.

The bankrupt MCI-Worldcom...

Southern California Edison says it may have to file for bankruptcy unless government officials can offer some relief.

In April of last year, the CR Company began bankruptcy procedures and the debt compensation rate of all its assets was only 5%.

**Type : BUSINESS Sub-type: END-ORG**

The company folded in 2002.

**Type : CONFLICT Sub-type: ATTACK**

U.S. forces continued to bomb Fallujah.

A car bomb exploded in central Baghdad.

Another exchange of gunfire in Gilo...

Sunday night's clashes...

...a possible coup.

Israel retaliated with rocket attacks and terrorists blew a hole in a United States warship in Yemen.

A car bomb exploded Thursday in a crowded outdoor market in the heart of Jerusalem, killing at least two people, police said.

Men in civilian clothes in the crowd began firing with AK-47 assault rifles and a 45-minute gun battle broke out.

A number of demonstrators threw stones and empty bottles at Israeli soldiers positioned near a Jewish holy site at the town's entrance.

**Type : CONFLICT Sub-type: DEMONSTRATE**

Thousands of people rioted in Port-au-Prince, Haiti over the weekend.

The union began its strike on Monday.

Protesters rallied on the White House lawn.

The rioting crowd broke windows and overturned cars.

A crowd of 1 million demonstrated Saturday in the capital, San'a, protesting against Israel, the United States and Arab leaders regarded as too soft on Israel.

In Ramallah, around 500 people took to the town's streets chanting slogans denouncing the summit and calling on Palestinian Authority leader Yasser Arafat not to take part in it.

For weeks Italian Jewish groups, World War II veterans and leftist political parties have staged protests against a meeting between the pope and Haider, arguing that a papal encounter would lend the Austrian politician legitimacy.

More than 40,000 workers were back at their jobs Thursday following a 1-day walkout that closed social welfare offices and crippled public medical services. During the work stoppage Wednesday, local residents were unable to register marriages or get documents for real estate transactions.

**Type : CONTACT Sub-type: MEET**

Bush and Putin met earlier this week to discuss Chechnya.

China, Japan, the United States, and both Koreas will hold a meeting this month.

Seven Lebanese Druze representatives out of eight who met under the leadership of representative Walid Jumblatt called on "youths in our Islamic Arab faction to actively join the heroic Palestinian Intifada against Israeli occupation and its agents, and to expose its means and methods."

Only representative Talal Arslan did not attend the meeting.

Tommy would again be summoned to meet prosecutors on Wednesday.

Owens complained to Defense Secretary William Cohen, prompting a meeting Friday between the governor and Gen. John Coburn, commander of the Army Material Command.

Mr. Erekat is due to travel to Washington to meet with US Secretary of State Madeleine Albright and other US officials attempting to win a ceasefire. Mrs. Albright has already met with Israel's acting foreign minister.

Egypt condemned Israel's attacks today and said it has the approval of other Arab states to host a summit with the Palestinians and Israelis only if the violence stops.

Eyewitnesses reported that Palestinians demonstrated today Sunday in the West Bank against the Sharm el-Sheikh summit to be held in Egypt tomorrow Monday.

**Type : CONTACT Sub-type: PHONE-WRITE**

John sent an e-mail to Jane.

All three parties discussed the matter in a teleconference Thursday.

John called Jane last night.

All else being equal, Duane Roelands would prefer to dash off short instant text messages to co-workers and friends with the service offered by Microsoft \_ the one he finds easiest to use.

People can communicate with international friends without the hefty phone bills.

Unlike the telephone, people can discreetly interact with others \_ or decide not to.

**Type : PERSONELL Sub-type: START-POSITION**

Foo Corp. hired Mary Smith in June 1998.

Mary Smith joined Foo Corp. in June 1998.

Bill Clinton started office on January 20, 1993.

In 1997, the company hired John D. Idol to take over as chief executive.

An issue in that strike is a management plan to hire more part-time drivers and limit overtime pay.

The question of which party controls the Texas Senate is especially important this year because the Senate will redraw congressional and legislative districts and could elect the next lieutenant governor if Gov. George W. Bush is elected president and is succeeded by Lt. Gov. Rick Perry.

**Type : PERSONELL Sub-type: END-POSITION**

Georgia fired football coach Jim Donnan Monday after a disappointing 7-4 season that started with the Bulldogs ranked No. 10 and picked to win the SEC East, his players said.

Richard Jr. had 14 months, before he was laid off in October.

The question of which party controls the Texas Senate is especially important this year because the Senate will redraw congressional and legislative districts and could elect the next lieutenant governor if Gov. George W. Bush is elected president and is succeeded by Lt. Gov. Rick Perry.

**Type : PERSONELL Sub-type: NOMINATE**

The president nominated Rep. Mark Foley (R-Fla.) to head the commission.

The recently nominated Foley said...

Presidential elections, including the one just ended, routinely include discussions on how a new chief executive's nominations to fill vacant positions might change the court's philosophical bent.

One of those difficult-to-dislodge judges was John Marshall, nominated by Adams to be chief justice.

Gore holds a degree from the university, and is one of about 500 people nominated for the job.

**Type : PERSONELL Sub-type: ELECT**

Greg Lashutka was elected mayor of Columbus in 1993.

The newly elected mayor...

Shareholders elected Sheila Johnson to a second term on the Board of Directors.

``We have a strong interest in supporting Yugoslavia's newly elected leaders as they work to build a truly democratic society," Clinton said.

The question of which party controls the Texas Senate is especially important this year because the Senate will redraw congressional and legislative districts and could elect the next lieutenant governor if Gov. George W. Bush is elected president and is succeeded by Lt. Gov. Rick Perry.

Many other Israelis have turned away from the man they elected just 18 months ago.

There is an election dispute, a tie vote as a matter of fact.

**Type : JUSTICE Sub-type: ARREST-JAIL**

Since May, Russia has jailed over 20 suspected terrorists without a trial.

The jailed suspects demanded to speak to a lawyer.

...where Pope is incarcerated.

Asked what he had done to attract attention since he was incarcerated, Chapman recalled a 1987 interview with People magazine, for which he received \$5,000, according to news reports at the time.

Abu Talb, the last major prosecution witness, has been jailed in Sweden for attacks against Jewish and American targets in Europe.

The youngest son of ex-dictator Suharto disobeyed a summons to surrender himself to prosecutors Monday and be imprisoned for corruption.

Florida police arrested James Harvey in Coral Springs on Friday

A judicial source said today, Friday, that five Croatians were arrested last Tuesday during an operation targeting a number of war criminals suspected of involvement in the killing of around 50 Serbian civilians in 1991.



A court of appeals on Tuesday suspended Gen. Augusto Pinochet's house arrest while it studied a judge's explanation for indicting the former dictator on homicide and kidnapping charges.

Canadian authorities arrested two Vancouver-area men on Friday and charged them in the deaths of 329 passengers and crew members of an Air-India Boeing 747 that blew up over the Irish Sea in 1985, en route from Canada to London.

**Type : JUSTICE Sub-type: RELEASE-PAROLE**

Harvey was released the following day.

The newly freed prisoners...

Russian President Vladimir Putin says he will pardon and release American businessman Edmond Pope.

**Type : JUSTICE Sub-type: TRIAL-HEARING**

Jenna Raleigh will be tried in a military court.

Clinton also touched on the matter of American Edmond Pope who is being tried in a closed court in Russia on charges of spying.

And so the case is being tried in federal court, where prosecutors can, and say they will, seek the death penalty.

A Palestinian terrorist began his testimony Friday in the trial of two Libyans accused of bombing Pan Am Flight 103, describing his role in attacks against Israel in the 1970s.

The trial resumed this week after a month of delays following the disclosure that new evidence surfaced on another group, the Damascusbased Palestinian Front for the Liberation of Palestine-General Command.

Clinton also touched on the matter of American Edmond Bob who is being tried in a closed court in Russia on charges of spying.

Stewart's hearing will be held on Monday in the superior court.

Midway through the hearing, Chief Justice Renquist seemed to scold his colleagues for being too talkative when he made an unusual offer to the lawyer representing Florida's Attorney General.

At a preliminary hearing Friday afternoon, Sauls made it clear he would take a no-nonsense approach to the trial.

**Type : JUSTICE Sub-type: CHARGE-INDICT**

Joy Fenter was indicted by a grand jury on eleven counts of mail fraud.

Milosevic, who has been indicted by the international war crimes tribunal in The Hague, Netherlands, cannot leave Yugoslavia without risking arrest and extradition.

Guzman indicted Pinochet, holding him responsible for the actions by the "Caravan of Death," a military party that killed 73 political prisoners shortly after the 1973 coup in which Pinochet ousted Marxist President Salvador Allende.

In an eight-count indictment, the men were charged with using suitcases packed with explosives to bomb two Air-India jets on the same day, June 23, 1985.

Ryan Mathers was charged with reckless endangerment.

Appointed to the federal bench in 1979, he was charged two years later with conspiracy to accept a bribe in a case he presided over in Miami.

Bagri was also charged with trying to murder Tara Singh Hayer, editor of The Indo-Canadian Times, North America's largest Punjabi newspaper, in 1998.

**Type : JUSTICE Sub-type: SUE**

Donald Crutchfield filed suit against Toys 'R' Us in 1997.

Five years there, \$30 million. U.S. victims of terrorism have been able to sue foreign governments since 1996.

Brentwood Academy responded with a lawsuit that has made its way to the U.S. Supreme Court, where arguments will be made Wednesday.

**Type : JUSTICE Sub-type: CONVICT**

Martha Breckenridge was convicted of two counts of manslaughter.

Tommy, a multimillionaire with a playboy image and love of fast cars, is the first member of Suharto's family to be convicted of graft.

It found him guilty of enriching himself through a property deal with the state's main food supply agency.

A Russian court convicted Pope Wednesday on espionage charges and sentenced him to 20 years in prison.

**Type : JUSTICE Sub-type: SENTENCE**

She was sentenced to life without parole.

Hutomo "Tommy" Mandala Putra, 37, was sentenced to 18 months in prison on Sept. 22 by the Supreme Court, which overturned an earlier acquittal by a lower court.

A Russian court convicted Pope Wednesday on espionage charges and sentenced him to 20 years in prison.

46-year-old Abu Talib was sentenced to life imprisonment in 1990 in Sweden for terrorist acts in Amsterdam, Copenhagen and Stockholm between 1985 and 1986.

Solomon could be sentenced to up to 211 years in prison.

**Type : JUSTICE Sub-type: FINE**

Ms. Brooks, who could go to prison and will certainly be heavily fined has agreed to turn state's evidence, turning against her boss.

It fined the school \$3,000 and banned its football program.

The company was ordered to pay a fine of \$300,000.

**Type : JUSTICE Sub-type: EXECUTE**

David Goran was executed by lethal injection in March 1987.

Twelve executed prisoners have been posthumously exonerated.

She recently sold the film rights to her latest book, ``Saints and Villains," about Dietrich Bonhoeffer, the German theologian executed by the Nazis for plotting against Hitler.

Bush said he might change his mind if he did not think that executions saved lives.

**Type : JUSTICE Sub-type: EXTRADITE**

The former leader was extradited to Burkina Faso.

Milosevic, who has been indicted by the international war crimes tribunal in The Hague, Netherlands, cannot leave Yugoslavia without risking arrest and extradition.

In the end, Milosevic may even prefer extradition to The Hague rather than stay here and face our justice," said opposition leader Zarko Korac.

Kimes' main demand was that his mother not be extradited to California, where the two face the death penalty on charges they killed a former business associate.

**Type : JUSTICE Sub-type: ACQUIT**

Chase was acquitted after a trial in the Senate.

He was acquitted by a jury in 1983, but a panel of judges reopened the case four years later, accusing him of both the original crime and lying about it under oath.

**Type : JUSTICE Sub-type: APPEAL**

Defense attorneys said they will appeal.

**Type : JUSTICE Sub-type: PARDON**

Russian President Vladimir Putin says he will pardon and release American businessman Edmond Pope.
